# Supplementary material for: Pharmacological Potential and Chemical Characterization of Bridelia ferruginea Benth.—A Native Tropical African Medicinal Plant
Source: PubMed Central journal article supplement (PMC7926895; doi:10.3390/antibiotics10020223), 2021-02-23
Supplement: antibiotics-10-00223-s001.pdf [file antibiotics-10-00223-s001.pdf]

# Pharmacological Potential and Chemical Characterization of *Bridelia ferruginea* Benth. – A Native Tropical African Medicinal Plant

Mohamad Fawzi Mahomoodally<sup>1,2,\*</sup>, Sharmeen Jugreet<sup>3</sup>, Kouadio Ibrahime Sinan<sup>4</sup>, Gokhan Zengin<sup>4</sup>, Gunes Ak<sup>4</sup>, Ramazan Ceylan<sup>4</sup>, József Jekő<sup>5</sup>, Zoltán Cziáky<sup>5</sup>, Paola Angelini<sup>6,\*</sup>, Giancarlo Angeles Flores<sup>6</sup>, Roberto Venanzoni<sup>6</sup>, Simonetta Cristina Di Simone<sup>7</sup>, Luigi Menghini<sup>7</sup>, Giustino Orlando<sup>7</sup>, Claudio Ferrante<sup>7</sup>, Ouattara Katinan Etienne<sup>8</sup> and Massimo Tacchini<sup>9</sup>

<sup>1</sup> Department for Management of Science and Technology Development, Ton Duc Thang University, Ho Chi Minh City 758307, Vietnam

<sup>2</sup> Faculty of Applied Sciences, Ton Duc Thang University, Ho Chi Minh City 758307, Vietnam

<sup>3</sup> Department of Health Sciences, Faculty of Medicine and Health Sciences, University of Mauritius, Réduit 80837, Mauritius; bibi.jugreet2@umail.uom.ac.mu

<sup>4</sup> Physiology and Biochemistry Research Laboratory, Department of Biology, Science Faculty, Selcuk University, Konya 42130, Turkey; sinankouadio@gmail.com (K.I.S.); gokhanzengin@selcuk.edu.tr (G.Z.); akguneselcuk@gmail.com (G.A.); biyoram7@gmail.com (R.C.)

<sup>5</sup> Agricultural and Molecular Research and Service Institute, University of Nyíregyháza, 4400 Nyíregyháza, Hungary jjozsi@gmail.com (J.J.); cziaky.zoltan@nye.hu (Z.C.)

<sup>6</sup> Department of Chemistry, Biology and Biotechnology, University of Perugia, 06100 Perugia, Italy; giancarlo.angelesflores@studenti.unipg.it (G.A.F.); roberto.venanzoni@unipg.it (R.V.)

<sup>7</sup> Department of Pharmacy, Università degli Studi “Gabriele d’Annunzio”, via dei Vestini 31, 66100 Chieti, Italy; disimonesimonetta@gmail.com (S.C.D.S.); luigi.menghini@unich.it (L.M.); giustino.orlando@unich.it (G.O.); claudio.ferrante@unich.it (C.F.)

<sup>8</sup> Laboratoire de Botanique, UFR Biosciences, Université Félix Houphouët-Boigny, 01 Abidjan, Cote D'Ivoire, katinan.etienne@gmail.com

<sup>9</sup> Department of Life Sciences and Biotechnology (SVeB), UR7 Terra&Acqua Tech, University of Ferrara, 44121 Ferrara, Italy; massimo.tacchini@unife.it

\* Correspondence: mohamad.fawzi.mahomoodally@tdtu.edu.vn (M.F.M); paola.angelini@unipg.it (P.A.)

Table S1. Chemical composition of ethyl acetate extract from stem barks

| No.             | Name                                               | Formula   | Rt    | [M + H] <sup>+</sup> | [M - H] <sup>-</sup> | Fragment 1 | Fragment 2 | Fragment 3 | Fragment 4 | Fragment 5 | Literature |
|-----------------|----------------------------------------------------|-----------|-------|----------------------|----------------------|------------|------------|------------|------------|------------|------------|
| 1 <sup>1</sup>  | Gallic acid (3,4,5-Trihydroxybenzoic acid)         | C7H6O5    | 2,63  |                      | 169,01370            | 125,0229   | 97,0281    | 81,0331    | 79,0174    | 69,0329    |            |
| 2               | Gallocatechin                                      | C15H14O7  | 5,53  |                      | 305,06613            | 261,0764   | 219,0662   | 167,0341   | 137,0231   | 125,0229   |            |
| 3               | Pantothenic acid                                   | C9H17NO5  | 6,08  | 220,11850            |                      | 202,1071   | 184,0969   | 174,1127   | 116,0346   | 90,0553    |            |
| 4 <sup>1</sup>  | Epigallocatechin                                   | C15H14O7  | 14,17 |                      | 305,06613            | 261,0772   | 219,0654   | 167,0337   | 137,0231   | 125,0229   |            |
| 5 <sup>1</sup>  | Epigallocatechin-3-O-gallate (Teatannin II)        | C22H18O11 | 16,81 |                      | 457,07709            | 331,0462   | 305,0656   | 169,0130   | 161,0232   | 125,0229   |            |
| 6 <sup>1</sup>  | Epicatechin                                        | C15H14O6  | 17,53 |                      | 289,07121            | 245,0811   | 203,0704   | 151,0385   | 125,0228   | 109,0279   |            |
| 7               | Corilagin                                          | C27H22O18 | 17,91 |                      | 633,07279            | 463,0516   | 419,0624   | 300,9989   | 275,0198   | 169,0132   | [2]        |
| 8 <sup>1</sup>  | Ferulic acid                                       | C10H10O4  | 19,85 |                      | 193,05009            | 178,0260   | 149,0595   | 137,0231   | 134,0360   | 121,0279   |            |
| 9               | Ellagic acid-O-hexoside                            | C20H16O13 | 20,34 |                      | 463,05127            | 300,9988   | 299,9910   | 298,9852   | 283,9948   |            |            |
| 10              | Methylellagic acid-O-hexoside                      | C21H18O13 | 22,26 |                      | 477,06692            | 315,0147   | 314,0071   | 299,9911   | 298,9833   | 270,9886   |            |
| 11              | Isovitexin (Apigenin-6-C-glucoside)                | C21H20O10 | 22,70 | 433,11348            |                      | 415,1014   | 397,0918   | 337,0702   | 313,0703   | 283,0597   |            |
| 12              | Ellagic acid-O-pentoside                           | C19H14O12 | 23,23 |                      | 433,04071            | 300,9989   | 299,9910   | 298,9810   | 257,0085   |            |            |
| 13              | Eschweilenol C (Ellagic acid-4-O-rhamnoside)       | C20H16O12 | 23,56 |                      | 447,05636            | 300,9988   | 299,9909   | 298,9851   |            |            |            |
| 14              | Ellagic acid                                       | C14H6O8   | 23,92 |                      | 300,99845            | 283,9963   | 257,0089   | 229,0135   | 201,0184   | 185,0234   |            |
| 15              | Ducheside A (3-O-Methylellagic acid-4'-O-xyloside) | C20H16O12 | 25,25 |                      | 447,05636            | 315,0146   | 314,0068   | 299,9910   | 298,9831   | 270,9885   |            |
| 16              | Dimethoxy-tetrahydroxy(iso)flavone-O-hexoside      | C23H24O13 | 25,45 |                      | 507,11387            | 345,0607   | 344,0534   | 329,0309   | 301,0348   | 273,0411   |            |
| 17              | 3-O-Methylellagic acid-O-rhamnoside                | C21H18O12 | 25,78 |                      | 461,07201            | 315,0147   | 299,9911   | 298,9843   | 270,9878   |            |            |
| 18              | 3-O-Methylellagic acid                             | C15H8O8   | 26,23 |                      | 315,01410            | 299,9908   | 244,0011   | 228,0065   | 200,0102   |            |            |
| 19 <sup>1</sup> | Quercetin (3,3',4',5,7-Pentahydroxyflavone)        | C15H10O7  | 27,49 |                      | 301,03483            | 273,0405   | 178,9977   | 151,0024   | 121,0280   | 107,0121   |            |
| 20              | 3,3'-Di-O-methylellagic acid                       | C16H10O8  | 28,42 |                      | 329,02975            | 314,0067   | 298,9832   | 270,9885   |            |            |            |
| 21              | Methoxy-tetrahydroxy(iso)flavone                   | C16H12O7  | 28,74 |                      | 315,05048            | 300,0274   | 271,0245   | 255,0295   | 243,0294   |            |            |
| 22 <sup>1</sup> | Tricin (3',5'-Dimethoxy-4',5,7-trihydroxyflavone)  | C17H14O7  | 30,37 |                      | 329,06613            | 314,0432   | 313,0357   | 299,0196   | 271,0249   | 227,0337   |            |
| 23              | 3,3',4'-Tri-O-methylellagic acid                   | C17H12O8  | 30,79 |                      | 343,04540            | 328,0224   | 312,9991   | 297,9751   | 285,0039   |            |            |
| 24              | Dimethoxy-trihydroxy(iso)flavone isomer 1          | C17H14O7  | 31,05 |                      | 329,06613            | 314,0433   | 299,0197   | 285,0401   | 271,0248   | 243,0293   |            |
| 25              | 3,3',4,4'-Tetra-O-methylellagic acid               | C18H14O8  | 32,62 | 359,07670            |                      | 344,0522   | 343,0444   | 329,0288   | 313,0337   |            |            |
| 26              | Dimethoxy-trihydroxy(iso)flavone isomer 2          | C17H14O7  | 33,27 |                      | 329,06613            | 314,0433   | 299,0197   | 271,0248   | 243,0294   |            |            |

Table S2. Chemical composition of methanol extract from stem barks

| No.             | Name                                               | Formula   | Rt    | [M + H] <sup>+</sup> | [M - H] <sup>-</sup> | Fragment<br>1 | Fragment<br>2 | Fragment<br>3 | Fragment<br>4 | Fragment<br>5 | Literature |
|-----------------|----------------------------------------------------|-----------|-------|----------------------|----------------------|---------------|---------------|---------------|---------------|---------------|------------|
| 1               | Epigallocatechin-(7-O-4')-gallocatechin or isomer  | C30H26O13 | 1,27  |                      | 593,12952            | 467,0979      | 423,0721      | 407,0772      | 305,0667      | 125,0229      | [69]       |
| 2 <sup>1</sup>  | Gallic acid (3,4,5-Trihydroxybenzoic acid)         | C7H6O5    | 2,62  |                      | 169,01370            | 125,0229      | 97,0280       | 81,0332       | 79,0174       | 69,0330       |            |
| 3               | Gallocatechin                                      | C15H14O7  | 5,51  |                      | 305,06613            | 261,0764      | 219,0654      | 167,0337      | 137,0230      | 125,0229      |            |
| 4               | Pantothenic acid                                   | C9H17NO5  | 6,04  | 220,11850            |                      | 202,1074      | 184,0969      | 174,1127      | 116,0345      | 90,0554       |            |
| 5               | Epigallocatechin-(7-O-4')-gallocatechin or isomer  | C30H26O13 | 6,16  |                      | 593,12952            | 467,0988      | 441,0814      | 423,0721      | 305,0667      | 125,0229      | [69]       |
| 6               | Prodelphinidin C                                   | C30H26O13 | 11,65 |                      | 593,12952            | 425,0880      | 407,0771      | 289,0718      | 177,0181      | 125,0229      |            |
| 7               | Epigallocatechin-(7-O-4')-gallocatechin or isomer  | C30H26O13 | 13,20 |                      | 593,12952            | 467,0985      | 441,0837      | 423,0720      | 305,0668      | 125,0229      | [69]       |
| 8 <sup>1</sup>  | Catechin                                           | C15H14O6  | 13,96 |                      | 289,07121            | 245,0815      | 203,0706      | 151,0386      | 125,0230      | 109,0280      |            |
| 9 <sup>1</sup>  | Epigallocatechin                                   | C15H14O7  | 14,17 |                      | 305,06613            | 261,0766      | 219,0656      | 167,0338      | 137,0231      | 125,0230      |            |
| 10              | Epigallocatechin-(7-O-4')-gallocatechin or isomer  | C30H26O13 | 14,76 |                      | 593,12952            | 467,0984      | 441,0831      | 423,0721      | 305,0667      | 125,0229      | [69]       |
| 11 <sup>1</sup> | Epigallocatechin-3-O-gallate (Teatanin II)         | C22H18O11 | 16,82 |                      | 457,07709            | 331,0462      | 305,0668      | 169,0130      | 161,0232      | 125,0229      |            |
| 12              | Dihydrokaempferol-O-hexoside                       | C21H22O11 | 17,51 |                      | 449,10839            | 287,0574      | 269,0457      | 259,0610      | 125,0228      |               |            |
| 13 <sup>1</sup> | Epicatechin                                        | C15H14O6  | 17,53 |                      | 289,07121            | 245,0815      | 203,0706      | 151,0388      | 125,0229      | 109,0280      |            |
| 14              | Corilagin                                          | C27H22O18 | 17,91 |                      | 633,07279            | 463,0524      | 419,0587      | 300,9990      | 275,0197      | 169,0131      | [2]        |
| 15 <sup>1</sup> | Epicatechin-3-O-gallate                            | C22H18O10 | 19,79 |                      | 441,08218            | 289,0719      | 245,0817      | 169,0131      | 125,0230      | 109,0279      |            |
| 16 <sup>1</sup> | Ferulic acid                                       | C10H10O4  | 19,86 |                      | 193,05009            | 178,0260      | 149,0594      | 137,0230      | 134,0360      | 121,0278      |            |
| 17              | Ellagic acid-O-hexoside                            | C20H16O13 | 20,34 |                      | 463,05127            | 300,9990      | 299,9911      | 298,9852      | 283,9989      |               |            |
| 18              | Methylellagic acid-O-hexoside                      | C21H18O13 | 22,42 |                      | 477,06692            | 315,0146      | 300,9983      | 299,9910      | 298,9832      | 270,9881      |            |
| 19              | Myricitrin (Myricetin-3-O-rhamnoside)              | C21H20O12 | 22,46 |                      | 463,08765            | 317,0308      | 316,0223      | 287,0197      | 271,0246      | 151,0024      | [2]        |
| 20              | Isovitexin (Apigenin-6-C-glucoside)                | C21H20O10 | 22,70 | 433,11348            |                      | 415,1008      | 397,0908      | 337,0700      | 313,0705      | 283,0598      |            |
| 21              | Coatline A or isomer                               | C21H24O10 | 23,06 |                      | 435,12913            | 417,1211      | 345,0979      | 315,0875      | 221,0452      | 209,0449      |            |
| 22              | Ellagic acid-O-pentoside                           | C19H14O12 | 23,27 |                      | 433,04071            | 300,9988      | 299,9911      | 298,9810      | 257,0080      |               |            |
| 23              | Eschweilenol C (Ellagic acid-4-O-rhamnoside)       | C20H16O12 | 23,58 |                      | 447,05636            | 300,9988      | 299,9910      |               |               |               |            |
| 24              | Ellagic acid                                       | C14H6O8   | 23,94 |                      | 300,99845            | 283,9966      | 257,0087      | 229,0135      | 201,0185      | 185,0235      |            |
| 25 <sup>1</sup> | Myricetin (3,3',4',5,5',7-Hexahydroxyflavone)      | C15H10O8  | 24,70 |                      | 317,02974            | 271,0248      | 192,0061      | 178,9975      | 151,0023      | 137,0231      | [70]       |
| 26              | Tricin-O-hexoside                                  | C23H24O12 | 24,74 |                      | 491,11896            | 476,0949      | 461,0718      | 329,0655      | 313,0356      | 299,0212      |            |
| 27              | Ducheside A (3-O-Methylellagic acid-4'-O-xyloside) | C20H16O12 | 25,26 |                      | 447,05636            | 315,0146      | 314,0070      | 299,9910      | 298,9833      | 270,9885      |            |
| 28              | Dimethoxy-tetrahydroxy(iso)flavone-O-hexoside      | C23H24O13 | 25,45 |                      | 507,11387            | 345,0606      | 344,0539      | 329,0306      | 301,0351      | 273,0399      |            |

|                 |                                                   |           |       |           |           |          |          |          |          |          |
|-----------------|---------------------------------------------------|-----------|-------|-----------|-----------|----------|----------|----------|----------|----------|
| 29              | 3-O-Methylellagic acid-O-rhamnoside               | C21H18O12 | 25,80 |           | 461,07201 | 315,0146 | 299,9910 | 298,9829 | 270,9884 |          |
| 30              | Dihydroxy(iso)flavone-C-hexoside                  | C21H20O9  | 26,15 | 417,11856 |           | 399,1057 | 381,0956 | 321,0758 | 297,0752 | 267,0651 |
| 31              | 3-O-Methylellagic acid                            | C15H8O8   | 26,24 |           | 315,01410 | 299,9910 | 244,0014 | 228,0058 | 200,0111 |          |
| 32              | Eschweilenol A or isomer                          | C20H10O11 | 26,39 |           | 425,01449 | 300,9988 | 299,9909 | 298,9835 |          |          |
| 33 <sup>1</sup> | Quercetin (3,3',4',5,7-Pentahydroxyflavone)       | C15H10O7  | 27,50 |           | 301,03483 | 273,0405 | 178,9972 | 151,0023 | 121,0279 | 107,0123 |
| 34              | 3,3'-Di-O-methylellagic acid                      | C16H10O8  | 28,42 |           | 329,02975 | 314,0069 | 298,9832 | 270,9885 |          |          |
| 35              | Methoxy-tetrahydroxy(iso)flavone                  | C16H12O7  | 28,73 |           | 315,05048 | 300,0273 | 271,0245 | 255,0296 | 243,0297 |          |
| 36 <sup>1</sup> | Tricin (3',5'-Dimethoxy-4',5,7-trihydroxyflavone) | C17H14O7  | 30,38 |           | 329,06613 | 314,0433 | 313,0356 | 299,0196 | 271,0245 | 227,0335 |
| 37              | 3,3',4-Tri-O-methylellagic acid                   | C17H12O8  | 30,78 |           | 343,04540 | 328,0223 | 312,9990 | 297,9757 | 285,0043 |          |
| 38              | 3,3',4,4'-Tetra-O-methylellagic acid              | C18H14O8  | 32,63 | 359,07670 |           | 344,0523 | 343,0445 | 329,0288 | 313,0342 |          |

Table S3. Chemical composition of water extract from stem barks

| No.             | Name                                               | Formula   | Rt    | [M + H] <sup>+</sup> | [M - H] <sup>-</sup> | Fragment 1 | Fragment 2 | Fragment 3 | Fragment 4 | Fragment 5 | Literature |
|-----------------|----------------------------------------------------|-----------|-------|----------------------|----------------------|------------|------------|------------|------------|------------|------------|
| 1 <sup>1</sup>  | Gallic acid (3,4,5-Trihydroxybenzoic acid)         | C7H6O5    | 2,62  |                      | 169,01370            | 125,0230   | 97,0280    | 81,0331    | 79,0174    | 69,0330    |            |
| 2               | Gallocatechin                                      | C15H14O7  | 5,53  |                      | 305,06613            | 261,0771   | 219,0657   | 167,0339   | 137,0232   | 125,0230   |            |
| 3               | Pantothenic acid                                   | C9H17NO5  | 6,09  | 220,11850            |                      | 202,1076   | 184,0972   | 174,1125   | 116,0345   | 90,0555    |            |
| 4               | Epigallocatechin-(7-O-4')-gallocatechin or isomer  | C30H26O13 | 6,23  |                      | 593,12952            | 467,0985   | 441,0833   | 423,0723   | 305,0671   | 125,0231   | [69]       |
| 5               | Prodelphinidin C                                   | C30H26O13 | 11,69 |                      | 593,12952            | 425,0883   | 407,0776   | 289,0721   | 177,0183   | 125,0230   |            |
| 6               | Epigallocatechin-(7-O-4')-gallocatechin or isomer  | C30H26O13 | 13,23 |                      | 593,12952            | 467,0985   | 441,0830   | 423,0724   | 305,0670   | 125,0230   | [69]       |
| 7 <sup>1</sup>  | Catechin                                           | C15H14O6  | 13,97 |                      | 289,07121            | 245,0818   | 203,0707   | 151,0389   | 125,0230   | 109,0281   |            |
| 8 <sup>1</sup>  | Epigallocatechin                                   | C15H14O7  | 14,20 |                      | 305,06613            | 261,0766   | 219,0660   | 167,0338   | 137,0232   | 125,0230   |            |
| 9               | Epigallocatechin-(7-O-4')-gallocatechin or isomer  | C30H26O13 | 14,76 |                      | 593,12952            | 467,0985   | 441,0824   | 423,0720   | 305,0672   | 125,0230   | [69]       |
| 10 <sup>1</sup> | Epigallocatechin-3-O-gallate (Teatannin II)        | C22H18O11 | 16,83 |                      | 457,07709            | 331,0472   | 305,0669   | 169,0132   | 161,0233   | 125,0230   |            |
| 11              | 5-O-(4-Coumaroyl)quinic acid                       | C16H18O8  | 17,39 |                      | 337,09235            | 191,0553   | 173,0444   | 163,0389   | 119,0488   | 93,0330    |            |
| 12              | Dihydrokaempferol-O-hexoside                       | C21H22O11 | 17,52 |                      | 449,10839            | 287,0565   | 269,0457   | 259,0612   | 125,0230   |            |            |
| 13 <sup>1</sup> | Epicatechin                                        | C15H14O6  | 17,54 |                      | 289,07121            | 245,0817   | 203,0709   | 151,0389   | 125,0230   | 109,0281   |            |
| 14              | Corilagin                                          | C27H22O18 | 17,92 |                      | 633,07279            | 463,0523   | 419,0622   | 300,9992   | 275,0200   | 169,0129   | [2]        |
| 15              | 5-O-Feruloylquinic acid                            | C17H20O9  | 18,43 |                      | 367,10291            | 193,0501   | 191,0555   | 173,0446   | 134,0360   | 93,0331    |            |
| 16 <sup>1</sup> | Epicatechin-3-O-gallate                            | C22H18O10 | 19,80 |                      | 441,08218            | 289,0722   | 245,0817   | 169,0132   | 125,0230   | 109,0280   |            |
| 17 <sup>1</sup> | Ferulic acid                                       | C10H10O4  | 19,88 |                      | 193,05009            | 178,0262   | 149,0600   | 137,0232   | 134,0361   | 121,0282   |            |
| 18              | Ellagic acid-O-hexoside                            | C20H16O13 | 20,36 |                      | 463,05127            | 300,9992   | 299,9914   | 298,9855   | 283,9965   |            |            |
| 19 <sup>1</sup> | Vitexin (Apigenin-8-C-glucoside)                   | C21H20O10 | 21,82 | 433,11348            |                      | 415,1031   | 397,0927   | 337,0690   | 313,0708   | 283,0602   |            |
| 20              | Methylellagic acid-O-hexoside                      | C21H18O13 | 22,46 |                      | 477,06692            | 315,0150   | 300,9978   | 299,9913   | 298,9836   | 270,9887   |            |
| 21              | Myricitrin (Myricetin-3-O-rhamnoside)              | C21H20O12 | 22,50 |                      | 463,08765            | 317,0293   | 316,0226   | 287,0206   | 271,0256   | 151,0026   | [2]        |
| 22              | Isovitexin (Apigenin-6-C-glucoside)                | C21H20O10 | 22,73 | 433,11348            |                      | 415,1020   | 397,0922   | 337,0705   | 313,0708   | 283,0603   |            |
| 23              | Coatline A or isomer                               | C21H24O10 | 23,10 |                      | 435,12913            | 417,1182   | 345,0979   | 315,0878   | 221,0447   | 209,0452   |            |
| 24              | Ellagic acid-O-pentoside                           | C19H14O12 | 23,28 |                      | 433,04071            | 300,9992   | 299,9914   | 298,9836   | 257,0094   |            |            |
| 25              | Eschweilenol C (Ellagic acid-4-O-rhamnoside)       | C20H16O12 | 23,62 |                      | 447,05636            | 300,9992   | 299,9913   |            |            |            |            |
| 26              | Ellagic acid                                       | C14H6O8   | 23,96 |                      | 300,99845            | 283,9963   | 257,0092   | 229,0136   | 201,0190   | 185,0237   |            |
| 27 <sup>1</sup> | Myricetin (3,3',4',5',5',7-Hexahydroxyflavone)     | C15H10O8  | 24,74 |                      | 317,02974            | 271,0254   | 192,0060   | 178,9977   | 151,0025   | 137,0233   | [70]       |
| 28              | Ducheside A (3-O-Methylellagic acid-4'-O-xyloside) | C20H16O12 | 25,30 |                      | 447,05636            | 315,0151   | 314,0071   | 299,9914   | 298,9837   | 270,9885   |            |
| 29              | Dimethoxy-tetrahydroxy(iso)flavone-O-hexoside      | C23H24O13 | 25,49 |                      | 507,11387            | 345,0621   | 344,0540   | 329,0305   | 301,0356   | 273,0411   |            |

|                 |                                                   |           |       |           |           |          |          |          |          |          |
|-----------------|---------------------------------------------------|-----------|-------|-----------|-----------|----------|----------|----------|----------|----------|
| 30              | 3-O-Methylellagic acid-O-rhamnoside               | C21H18O12 | 25,84 |           | 461,07201 | 315,0150 | 299,9913 | 298,9835 | 270,9892 |          |
| 31              | Dihydroxy(iso)flavone-C-hexoside                  | C21H20O9  | 26,19 | 417,11856 |           | 399,1073 | 381,0970 | 321,0760 | 297,0759 | 267,0652 |
| 32              | 3-O-Methylellagic acid                            | C15H8O8   | 26,28 |           | 315,01410 | 299,9913 | 244,0006 | 228,0058 | 200,0100 |          |
| 33 <sup>1</sup> | Quercetin (3,3',4',5,7-Pentahydroxyflavone)       | C15H10O7  | 27,53 |           | 301,03483 | 273,0402 | 178,9979 | 151,0025 | 121,0281 | 107,0125 |
| 34              | 3,3'-Di-O-methylellagic acid                      | C16H10O8  | 28,47 |           | 329,02975 | 314,0072 | 298,9835 | 270,9886 |          |          |
| 35              | Methoxy-tetrahydroxy(iso)flavone                  | C16H12O7  | 28,77 |           | 315,05048 | 300,0270 | 271,0250 | 255,0298 | 243,0292 |          |
| 36 <sup>1</sup> | Tricin (3',5'-Dimethoxy-4',5,7-trihydroxyflavone) | C17H14O7  | 30,42 |           | 329,06613 | 314,0436 | 313,0355 | 299,0200 | 271,0249 | 227,0345 |
| 37              | Dimethoxy-tetrahydroxy(iso)flavone                | C17H14O8  | 30,53 |           | 345,06104 | 330,0386 | 329,0303 | 315,0151 | 287,0204 |          |
| 38              | 3,3',4-Tri-O-methylellagic acid                   | C17H12O8  | 30,83 |           | 343,04540 | 328,0227 | 312,9993 | 297,9756 | 285,0042 |          |
| 39              | 3,3',4,4'-Tetra-O-methylellagic acid              | C18H14O8  | 32,68 | 359,07670 |           | 344,0527 | 343,0450 | 329,0293 | 313,0345 |          |

Table S4. Chemical composition of ethyl acetate extract from leaves

| No.             | Name                                                  | Formula   | Rt    | [M + H] <sup>+</sup> | [M - H] <sup>-</sup> | Fragment 1 | Fragment 2 | Fragment 3 | Fragment 4 | Fragment 5 | Literature |
|-----------------|-------------------------------------------------------|-----------|-------|----------------------|----------------------|------------|------------|------------|------------|------------|------------|
| 1 <sup>1</sup>  | Chlorogenic acid (3-O-Caffeoylquinic acid)            | C16H18O9  | 14,85 | 355,10291            |                      | 163,0387   | 145,0283   | 135,0441   | 117,0336   | 89,0387    |            |
| 2               | Myricetin-O-hexoside                                  | C21H20O13 | 21,42 |                      | 479,08257            | 317,0302   | 316,0223   | 287,0197   | 271,0248   | 178,9977   |            |
| 3 <sup>1</sup>  | Vitexin (Apigenin-8-C-glucoside)                      | C21H20O10 | 21,85 | 433,11348            |                      | 415,1023   | 397,0911   | 337,0700   | 313,0702   | 283,0597   |            |
| 4               | Isovitexin (Apigenin-6-C-glucoside)                   | C21H20O10 | 22,75 | 433,11348            |                      | 415,1018   | 397,0912   | 337,0702   | 313,0702   | 283,0597   |            |
| 5 <sup>1</sup>  | Rutin (Quercetin-3-O-rutinoside)                      | C27H30O16 | 23,52 | 611,16122            |                      | 465,0982   | 303,0494   | 129,0548   | 85,0288    | 71,0497    |            |
| 6               | Tricin-O-hexoside isomer 1                            | C23H24O12 | 24,76 |                      | 491,11896            | 476,0953   | 461,0721   | 329,0660   | 313,0353   | 299,0196   |            |
| 7 <sup>1</sup>  | Quercitrin (Quercetin-3-O-rhamnoside)                 | C21H20O11 | 24,98 |                      | 447,09274            | 301,0353   | 300,0275   | 271,0248   | 255,0297   | 151,0024   |            |
| 8               | Kaempferol-3-O-rutinoside (Nicotiflorin)              | C27H30O15 | 25,35 |                      | 593,15065            | 327,0518   | 285,0403   | 284,0326   | 255,0295   | 227,0341   |            |
| 9               | Dimethoxy-tetrahydroxy(iso)flavone-O-hexoside         | C23H24O13 | 25,48 |                      | 507,11387            | 345,0614   | 344,0535   | 329,0302   | 301,0354   | 273,0405   |            |
| 10              | Tricin-O-hexoside isomer 2                            | C23H24O12 | 25,59 |                      | 491,11896            | 476,0961   | 461,0747   | 329,0664   | 313,0355   | 299,0198   |            |
| 11              | Trihydroxy-trimethoxy(iso)flavone-O-hexoside isomer 1 | C24H26O13 | 25,63 |                      | 521,12952            | 506,1068   | 491,0844   | 359,0764   | 343,0457   | 329,0295   |            |
| 12              | Isorhamnetin-3-O-rutinoside (Narcissin)               | C28H32O16 | 25,71 |                      | 623,16122            | 315,0510   | 314,0433   | 300,0275   | 299,0196   | 271,0247   |            |
| 13              | Dihydroactinidiolide                                  | C11H16O2  | 27,06 | 181,12286            |                      | 163,1115   | 145,1011   | 135,1168   | 121,1012   | 107,0858   |            |
| 14 <sup>1</sup> | Quercetin (3,3',4',5,7-Pentahydroxyflavone)           | C15H10O7  | 27,50 |                      | 301,03483            | 273,0412   | 178,9975   | 151,0023   | 121,0280   | 107,0123   |            |
| 15 <sup>1</sup> | Luteolin (3',4',5,7-Tetrahydroxyflavone)              | C15H10O6  | 28,38 |                      | 285,03991            | 217,0494   | 199,0400   | 175,0386   | 151,0024   | 133,0282   |            |
| 16              | Methoxy-tetrahydroxy(iso)flavone isomer 1             | C16H12O7  | 28,74 |                      | 315,05048            | 300,0274   | 271,0247   | 255,0297   | 243,0291   |            |            |
| 17 <sup>1</sup> | Kaempferol (3,4',5,7-Tetrahydroxyflavone)             | C15H10O6  | 29,86 |                      | 285,03991            | 257,0449   | 229,0502   | 185,0606   | 151,0022   | 107,0122   |            |
| 18              | Methoxy-tetrahydroxy(iso)flavone isomer 2             | C16H12O7  | 30,36 |                      | 315,05048            | 300,0274   | 271,0247   | 243,0290   |            |            |            |
| 19 <sup>1</sup> | Tricin (3',5'-Dimethoxy-4',5,7-trihydroxyflavone)     | C17H14O7  | 30,39 |                      | 329,06613            | 314,0433   | 313,0347   | 299,0197   | 271,0247   | 227,0343   |            |
| 20              | Methoxy-trihydroxy(iso)flavone isomer 1               | C16H12O6  | 30,44 | 301,07121            |                      | 286,0468   | 258,0517   |            |            |            |            |
| 21              | Methoxy-trihydroxy(iso)flavone isomer 2               | C16H12O6  | 30,89 | 301,07121            |                      | 286,0469   | 285,0392   | 258,0526   |            |            |            |
| 22              | 3,3',4,4'-Tetra-O-methylelagic acid                   | C18H14O8  | 32,62 | 359,07670            |                      | 344,0522   | 343,0442   | 329,0288   | 313,0341   |            |            |
| 23              | Dihydroxy-dimethoxy(iso)flavone                       | C17H14O6  | 35,48 | 315,08687            |                      | 300,0623   | 299,0544   | 272,0678   | 271,0597   | 257,0437   |            |
| 24              | Hydroxy-tetramethoxy(iso)flavone isomer 1             | C19H18O7  | 36,70 | 359,11308            |                      | 344,0879   | 343,0806   | 329,0651   | 313,0704   | 298,0831   |            |
| 25              | Hydroxy-tetramethoxy(iso)flavone isomer 2             | C19H18O7  | 37,04 | 359,11308            |                      | 344,0885   | 343,0806   | 329,0651   | 315,0852   | 301,0702   |            |

Table S5. Chemical composition of methanol extract from leaves

| No.             | Name                                                          | Formula   | Rt    | [M + H] <sup>+</sup> | [M - H] <sup>-</sup> | Fragment 1 | Fragment 2 | Fragment 3 | Fragment 4 | Fragment 5 | Literature |
|-----------------|---------------------------------------------------------------|-----------|-------|----------------------|----------------------|------------|------------|------------|------------|------------|------------|
| 1 <sup>1</sup>  | Gallic acid (3,4,5-Trihydroxybenzoic acid)                    | C7H6O5    | 2,64  |                      | 169,01370            | 125,0229   | 97,0280    | 81,0332    | 79,0174    | 69,0330    |            |
| 2               | Gallocatechin                                                 | C15H14O7  | 5,57  |                      | 305,06613            | 261,0770   | 219,0656   | 167,0337   | 137,0231   | 125,0229   |            |
| 3               | Pantothenic acid                                              | C9H17NO5  | 6,05  | 220,11850            |                      | 202,1073   | 184,0968   | 174,1120   | 116,0343   | 90,0554    |            |
| 4               | Kynurenic acid                                                | C10H7NO3  | 13,82 | 190,05042            |                      | 162,0548   | 144,0437   | 116,0497   | 89,0388    |            |            |
| 5 <sup>1</sup>  | Catechin                                                      | C15H14O6  | 14,00 |                      | 289,07121            | 245,0816   | 203,0707   | 151,0389   | 125,0229   | 109,0280   |            |
| 6 <sup>1</sup>  | Epigallocatechin                                              | C15H14O7  | 14,22 |                      | 305,06613            | 261,0760   | 219,0655   | 167,0337   | 137,0231   | 125,0229   |            |
| 7 <sup>1</sup>  | Chlorogenic acid (3-O-Caffeoylquinic acid)                    | C16H18O9  | 14,85 | 355,10291            |                      | 163,0387   | 145,0283   | 135,0440   | 117,0337   | 89,0389    |            |
| 8 <sup>1</sup>  | Epigallocatechin-3-O-gallate (Teatannin II)                   | C22H18O11 | 16,83 |                      | 457,07709            | 331,0462   | 305,0667   | 169,0129   | 161,0229   | 125,0228   |            |
| 9 <sup>1</sup>  | Epicatechin                                                   | C15H14O6  | 17,56 |                      | 289,07121            | 245,0811   | 203,0707   | 151,0384   | 125,0229   | 109,0279   |            |
| 10              | Myricetin-O-hexoside                                          | C21H20O13 | 21,41 |                      | 479,08257            | 317,0300   | 316,0222   | 287,0197   | 271,0247   | 178,9973   |            |
| 11 <sup>1</sup> | Vitexin (Apigenin-8-C-glucoside)                              | C21H20O10 | 21,82 | 433,11348            |                      | 415,1020   | 397,0915   | 337,0704   | 313,0703   | 283,0599   |            |
| 12              | Myricitrin (Myricetin-3-O-rhamnoside)                         | C21H20O12 | 22,49 |                      | 463,08765            | 317,0301   | 316,0222   | 287,0197   | 271,0246   | 151,0022   | [2]        |
| 13              | Isovitexin (Apigenin-6-C-glucoside)                           | C21H20O10 | 22,74 | 433,11348            |                      | 415,1015   | 397,0913   | 337,0699   | 313,0702   | 283,0597   |            |
| 14              | Coatline A or isomer                                          | C21H24O10 | 23,08 |                      | 435,12913            | 417,1188   | 345,0978   | 315,0875   | 221,0444   | 209,0449   |            |
| 15              | Hexahydroxy(iso)flavanone                                     | C15H12O8  | 23,11 |                      | 319,04540            | 301,0351   | 215,0341   | 193,0133   | 153,0179   | 125,0229   |            |
| 16 <sup>1</sup> | Rutin (Quercetin-3-O-rutinoside)                              | C27H30O16 | 23,51 | 611,16122            |                      | 465,1004   | 303,0495   | 129,0548   | 85,0289    | 71,0497    |            |
| 17              | Ellagic acid                                                  | C14H6O8   | 23,96 |                      | 300,99845            | 283,9972   | 257,0090   | 229,0136   | 201,0184   | 185,0235   |            |
| 18              | Methoxy-pentahydroxy(iso)flavone-O-rhamnosylhexoside isomer 1 | C28H32O17 | 24,11 |                      | 639,15613            | 331,0460   | 330,0380   | 316,0220   | 315,0147   | 287,0198   |            |
| 19              | Quercetin-O-malonylhexoside                                   | C23H22O13 | 24,14 |                      | 549,08805            | 505,0988   | 301,0352   | 300,0274   | 271,0247   | 255,0294   |            |
| 20              | Methoxy-pentahydroxy(iso)flavone-O-rhamnosylhexoside isomer 2 | C28H32O17 | 24,63 |                      | 639,15613            | 331,0449   | 330,0365   | 316,0222   | 315,0149   | 287,0199   |            |
| 21              | Kaempferol-O-rhamnosylhexoside                                | C27H30O15 | 24,71 |                      | 593,15065            | 327,0502   | 285,0404   | 284,0327   | 255,0295   | 227,0343   |            |
| 22              | Tricin-O-hexoside isomer 1                                    | C23H24O12 | 24,74 |                      | 491,11896            | 476,0958   | 461,0724   | 329,0662   | 313,0354   | 299,0198   |            |
| 23 <sup>1</sup> | Myricetin (3,3',4',5,5',7-Hexahydroxyflavone)                 | C15H10O8  | 24,77 |                      | 317,02974            | 271,0258   | 192,0058   | 178,9976   | 151,0023   | 137,0231   | [70]       |
| 24 <sup>1</sup> | Quercitrin (Quercetin-3-O-rhamnoside)                         | C21H20O11 | 24,97 |                      | 447,09274            | 301,0353   | 300,0274   | 271,0246   | 255,0294   | 151,0023   |            |
| 25              | N-trans-Feruloyltyramine                                      | C18H19NO4 | 25,11 | 314,13924            |                      | 177,0545   | 149,0596   | 145,0284   | 121,0649   | 117,0337   |            |
| 26              | Kaempferol-3-O-rutinoside (Nicotiflorin)                      | C27H30O15 | 25,34 |                      | 593,15065            | 327,0504   | 285,0405   | 284,0328   | 255,0296   | 227,0342   |            |



|                 |                                                                    |           |       |           |           |          |          |          |          |          |
|-----------------|--------------------------------------------------------------------|-----------|-------|-----------|-----------|----------|----------|----------|----------|----------|
| 27              | Dimethoxy-tetrahydroxy(iso)flavone-O-hexoside                      | C23H24O13 | 25,48 |           | 507,11387 | 345,0614 | 344,0535 | 329,0299 | 301,0354 | 273,0406 |
| 28              | Tricin-O-hexoside isomer 2                                         | C23H24O12 | 25,58 |           | 491,11896 | 476,0955 | 461,0726 | 329,0665 | 313,0353 | 299,0191 |
| 29              | Trihydroxy-trimethoxy(iso)flavone-O-hexoside isomer 1              | C24H26O13 | 25,63 |           | 521,12952 | 506,1054 | 491,0867 | 359,0771 | 343,0456 | 329,0300 |
| 30              | Isorhamnetin-3-O-rutinoside (Narcissin)                            | C28H32O16 | 25,70 |           | 623,16122 | 315,0511 | 314,0433 | 300,0276 | 299,0197 | 271,0248 |
| 31              | Dihydroxy(iso)flavone-C-hexoside                                   | C21H20O9  | 26,15 | 417,11856 |           | 399,1056 | 381,0963 | 321,0750 | 297,0754 | 267,0647 |
| 32              | Pentahydroxy(iso)flavanone                                         | C15H12O7  | 26,16 |           | 303,05048 | 285,0406 | 217,0501 | 177,0181 | 175,0388 | 125,0229 |
| 33              | Dimethoxy-trihydroxy(iso)flavone-O-hexoside                        | C23H24O12 | 26,46 |           | 491,11896 | 329,0666 | 328,0586 | 313,0354 | 285,0404 | 270,0166 |
| 34              | Trihydroxy-trimethoxy(iso)flavone-O-hexoside isomer 2              | C24H26O13 | 27,35 |           | 521,12952 | 506,1004 | 359,0768 | 343,0457 | 329,0300 | 328,0217 |
| 35 <sup>1</sup> | Quercetin (3,3',4',5,7-Pentahydroxyflavone)                        | C15H10O7  | 27,51 |           | 301,03483 | 273,0412 | 178,9975 | 151,0023 | 121,0279 | 107,0124 |
| 36 <sup>1</sup> | Luteolin (3',4',5,7-Tetrahydroxyflavone)                           | C15H10O6  | 28,39 |           | 285,03991 | 217,0500 | 199,0390 | 175,0391 | 151,0021 | 133,0281 |
| 37              | Methoxy-tetrahydroxy(iso)flavone isomer 1                          | C16H12O7  | 28,74 |           | 315,05048 | 300,0275 | 271,0248 | 255,0296 | 243,0291 |          |
| 38 <sup>1</sup> | Kaempferol (3,4',5,7-Tetrahydroxyflavone)                          | C15H10O6  | 29,87 |           | 285,03991 | 257,0449 | 229,0505 | 185,0609 | 151,0022 | 107,0123 |
| 39              | Methoxy-tetrahydroxy(iso)flavone isomer 2                          | C16H12O7  | 30,34 |           | 315,05048 | 300,0276 | 255,0284 | 243,0292 |          |          |
| 40              | Salcolin A (Tricin-4'-O-(erythro- $\beta$ -guaiacylglyceryl)ether) | C27H26O11 | 30,37 |           | 525,13969 | 329,0664 | 314,0433 | 299,0196 | 195,0653 | 165,0544 |
| 41 <sup>1</sup> | Tricin (3',5'-Dimethoxy-4',5,7-trihydroxyflavone)                  | C17H14O7  | 30,40 |           | 329,06613 | 314,0432 | 313,0359 | 299,0196 | 271,0248 | 227,0340 |
| 42              | Methoxy-trihydroxy(iso)flavone isomer 1                            | C16H12O6  | 30,44 | 301,07121 |           | 286,0468 | 258,0521 |          |          |          |
| 43              | Methoxy-trihydroxy(iso)flavone isomer 2                            | C16H12O6  | 30,91 | 301,07121 |           | 286,0468 | 285,0393 | 258,0523 |          |          |
| 44              | Salcolin B (Tricin-4'-O-(threo- $\beta$ -guaiacylglyceryl)ether)   | C27H26O11 | 31,18 |           | 525,13969 | 329,0667 | 314,0433 | 299,0198 | 195,0658 | 165,0544 |
| 45              | 3,3',4,4'-Tetra-O-methylellagic acid                               | C18H14O8  | 32,64 | 359,07670 |           | 344,0523 | 343,0440 | 329,0286 | 313,0341 |          |
| 46              | Dihydroxy-dimethoxy(iso)flavone                                    | C17H14O6  | 35,48 | 315,08687 |           | 300,0626 | 299,0540 | 272,0687 | 271,0600 | 257,0440 |
| 47              | Hydroxy-tetramethoxy(iso)flavone isomer 1                          | C19H18O7  | 36,70 | 359,11308 |           | 344,0882 | 343,0808 | 329,0652 | 313,0704 | 298,0830 |
| 48              | Hydroxy-tetramethoxy(iso)flavone isomer 2                          | C19H18O7  | 37,04 | 359,11308 |           | 344,0887 | 343,0804 | 329,0652 | 315,0851 | 301,0704 |

Table S6. Chemical composition of water extract from leaves

| No              | Name                                                          | Formula   | Rt        | [M + H] <sup>+</sup> | [M - H] <sup>-</sup> | Fragment 1 | Fragment 2 | Fragment 3 | Fragment 4 | Fragment 5 | Literature |
|-----------------|---------------------------------------------------------------|-----------|-----------|----------------------|----------------------|------------|------------|------------|------------|------------|------------|
| 1 <sup>1</sup>  | Gallic acid (3,4,5-Trihydroxybenzoic acid)                    | C7H6O5    | 2,60      |                      | 169,0137<br>0        | 125,0229   | 97,0280    | 81,0331    | 79,0174    | 69,0329    |            |
| 2               | Gallocatechin                                                 | C15H14O7  | 5,53      |                      | 305,0661<br>3        | 261,0770   | 219,0657   | 167,0338   | 137,0231   | 125,0229   |            |
| 3               | Pantothenic acid                                              | C9H17NO5  | 6,11      | 220,1185<br>0        |                      | 202,1072   | 184,0968   | 174,1124   | 116,0343   | 90,0554    |            |
| 4               | Kynurenic acid                                                | C10H7NO3  | 13,8<br>5 | 190,0504<br>2        |                      | 162,0548   | 144,0443   | 116,0500   | 89,0388    |            |            |
| 5 <sup>1</sup>  | Catechin                                                      | C15H14O6  | 13,9<br>7 |                      | 289,0712<br>1        | 245,0818   | 203,0706   | 151,0389   | 125,0230   | 109,0280   |            |
| 6 <sup>1</sup>  | Epigallocatechin                                              | C15H14O7  | 14,1<br>7 |                      | 305,0661<br>3        | 261,0772   | 219,0656   | 167,0338   | 137,0231   | 125,0229   |            |
| 7 <sup>1</sup>  | Chlorogenic acid (3-O-Caffeoylquinic acid)                    | C16H18O9  | 14,8<br>3 | 355,1029<br>1        |                      | 163,0388   | 145,0284   | 135,0441   | 117,0337   | 89,0389    |            |
| 8 <sup>1</sup>  | Epicatechin                                                   | C15H14O6  | 17,5<br>3 |                      | 289,0712<br>1        | 245,0814   | 203,0705   | 151,0392   | 125,0232   | 109,0281   |            |
| 9               | Myricetin-O-hexoside                                          | C21H20O13 | 21,4<br>0 |                      | 479,0825<br>7        | 317,0300   | 316,0223   | 287,0198   | 271,0248   | 178,9974   |            |
| 10 <sup>1</sup> | Vitexin (Apigenin-8-C-glucoside)                              | C21H20O10 | 21,8<br>2 | 433,1134<br>8        |                      | 415,1021   | 397,0918   | 337,0703   | 313,0702   | 283,0597   |            |
| 11              | Isovitexin (Apigenin-6-C-glucoside)                           | C21H20O10 | 22,7<br>4 | 433,1134<br>8        |                      | 415,1023   | 397,0916   | 337,0702   | 313,0703   | 283,0598   |            |
| 12              | Hexahydroxy(iso)flavanone                                     | C15H12O8  | 23,1<br>3 |                      | 319,0454<br>0        | 301,0355   | 215,0341   | 193,0134   | 153,0181   | 125,0229   |            |
| 13 <sup>1</sup> | Rutin (Quercetin-3-O-rutinoside)                              | C27H30O16 | 23,5<br>0 | 611,1612<br>2        |                      | 465,1017   | 303,0496   | 129,0549   | 85,0289    | 71,0497    |            |
| 14              | Ellagic acid                                                  | C14H6O8   | 23,9<br>5 |                      | 300,9984<br>5        | 283,9965   | 257,0078   | 229,0138   | 201,0183   | 185,0237   |            |
| 15              | Methoxy-pentahydroxy(iso)flavone-O-rhamnosylhexoside isomer 1 | C28H32O17 | 24,1<br>0 |                      | 639,1561<br>3        | 331,0460   | 330,0381   | 316,0222   | 315,0148   | 287,0198   |            |
| 16              | Quercetin-O-malonylhexoside                                   | C23H22O13 | 24,1<br>5 |                      | 549,0880<br>5        | 505,0988   | 301,0354   | 300,0275   | 271,0248   | 255,0296   |            |
| 17              | Methoxy-pentahydroxy(iso)flavone-O-rhamnosylhexoside isomer 2 | C28H32O17 | 24,6<br>3 |                      | 639,1561<br>3        | 331,0453   | 330,0365   | 316,0223   | 315,0148   | 287,0205   |            |
| 18              | Kaempferol-O-rhamnosylhexoside                                | C27H30O15 | 24,7<br>2 |                      | 593,1506<br>5        | 327,0498   | 285,0405   | 284,0327   | 255,0295   | 227,0343   |            |
| 19              | Tricin-O-hexoside isomer 1                                    | C23H24O12 | 24,7<br>6 |                      | 491,1189<br>6        | 476,0957   | 461,0727   | 329,0678   | 313,0354   | 299,0200   |            |

|                 |                                                       |           |           |               |               |          |          |          |          |          |      |
|-----------------|-------------------------------------------------------|-----------|-----------|---------------|---------------|----------|----------|----------|----------|----------|------|
| 20 <sup>1</sup> | Myricetin (3,3',4',5,5',7-Hexahydroxyflavone)         | C15H10O8  | 24,7<br>9 |               | 317,0297<br>4 | 271,0250 | 192,0053 | 178,9976 | 151,0024 | 137,0231 | [70] |
| 21 <sup>1</sup> | Quercitrin (Quercetin-3-O-rhamnoside)                 | C21H20O11 | 24,9<br>7 |               | 447,0927<br>4 | 301,0353 | 300,0274 | 271,0247 | 255,0295 | 151,0023 |      |
| 22              | Kaempferol-3-O-rutinoside (Nicotiflorin)              | C27H30O15 | 25,3<br>5 |               | 593,1506<br>5 | 327,0512 | 285,0404 | 284,0327 | 255,0295 | 227,0343 |      |
| 23              | Dimethoxy-tetrahydroxy(iso)flavone-O-hexoside         | C23H24O13 | 25,4<br>8 |               | 507,1138<br>7 | 345,0613 | 344,0535 | 329,0299 | 301,0355 | 273,0406 |      |
| 24              | Tricin-O-hexoside isomer 2                            | C23H24O12 | 25,6<br>0 |               | 491,1189<br>6 | 476,0958 | 461,0728 | 329,0658 | 313,0353 | 299,0206 |      |
| 25              | Trihydroxy-trimethoxy(iso)flavone-O-hexoside isomer 1 | C24H26O13 | 25,6<br>2 |               | 521,1295<br>2 | 506,1064 | 491,0847 | 359,0759 | 343,0454 | 329,0306 |      |
| 26              | Isorhamnetin-3-O-rutinoside (Narcissin)               | C28H32O16 | 25,7<br>0 |               | 623,1612<br>2 | 315,0506 | 314,0433 | 300,0274 | 299,0197 | 271,0247 |      |
| 27              | Dihydroxy(iso)flavone-C-hexoside                      | C21H20O9  | 26,1<br>7 | 417,1185<br>6 |               | 399,1069 | 381,0958 | 321,0750 | 297,0755 | 267,0649 |      |
| 28              | Pentahydroxy(iso)flavanone                            | C15H12O7  | 26,1<br>9 |               | 303,0504<br>8 | 285,0404 | 217,0499 | 177,0181 | 175,0389 | 125,0229 |      |
| 29              | Dimethoxy-trihydroxy(iso)flavone-O-hexoside           | C23H24O12 | 26,4<br>6 |               | 491,1189<br>6 | 329,0667 | 328,0587 | 313,0354 | 285,0405 | 270,0171 |      |
| 30              | Trihydroxy-trimethoxy(iso)flavone-O-hexoside isomer 2 | C24H26O13 | 27,3<br>6 |               | 521,1295<br>2 | 506,1004 | 359,0773 | 343,0456 | 329,0301 | 328,0216 |      |
| 31 <sup>1</sup> | Quercetin (3,3',4',5,7-Pentahydroxyflavone)           | C15H10O7  | 27,5<br>2 |               | 301,0348<br>3 | 273,0404 | 178,9975 | 151,0023 | 121,0280 | 107,0123 |      |
| 32              | Methoxy-tetrahydroxy(iso)flavone isomer 1             | C16H12O7  | 28,7<br>5 |               | 315,0504<br>8 | 300,0277 | 271,0249 | 255,0295 | 243,0292 |          |      |
| 33 <sup>1</sup> | Kaempferol (3,4',5,7-Tetrahydroxyflavone)             | C15H10O6  | 29,8<br>7 |               | 285,0399<br>1 | 257,0451 | 229,0508 | 185,0600 | 151,0022 | 107,0124 |      |
| 34              | Methoxy-tetrahydroxy(iso)flavone isomer 2             | C16H12O7  | 30,3<br>4 |               | 315,0504<br>8 | 300,0277 | 271,0244 | 243,0292 |          |          |      |
| 35 <sup>1</sup> | Tricin (3',5'-Dimethoxy-4',5,7-trihydroxyflavone)     | C17H14O7  | 30,4<br>0 |               | 329,0661<br>3 | 314,0432 | 313,0352 | 299,0197 | 271,0249 | 227,0344 |      |
| 36              | 3,3',4,4'-Tetra-O-methylelagic acid                   | C18H14O8  | 32,6<br>3 | 359,0767<br>0 |               | 344,0517 | 343,0458 | 329,0288 | 313,0333 |          |      |
| 37              | Hydroxy-tetramethoxy(iso)flavone isomer 1             | C19H18O7  | 36,7<br>0 | 359,1130<br>8 |               | 344,0882 | 343,0793 | 329,0649 | 313,0698 | 298,0830 |      |
| 38              | Hydroxy-tetramethoxy(iso)flavone isomer 2             | C19H18O7  | 37,0<br>3 | 359,1130<br>8 |               | 344,0888 | 343,0811 | 329,0654 | 315,0848 | 301,0704 |      |

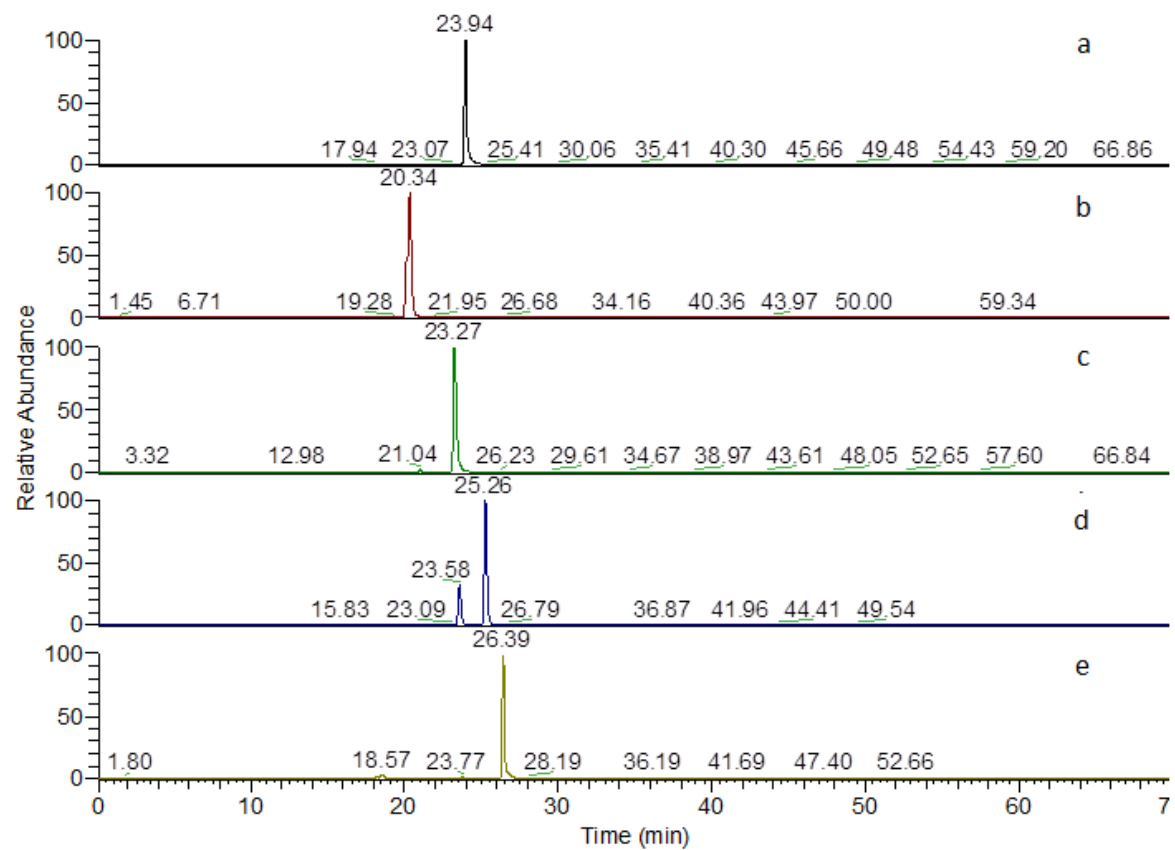

Figure S1. Extracted Ion Chromatograms of Ellagic acid and its derivatives (XIC).

Bridelia ferruginea\_stembark\_MeOH\_neg #12530 RT: 23.92 AV: 1 NL: 3.77E7  
F: FTMS - p ESI d Full ms2 300.9122@hcd35.00 [5]

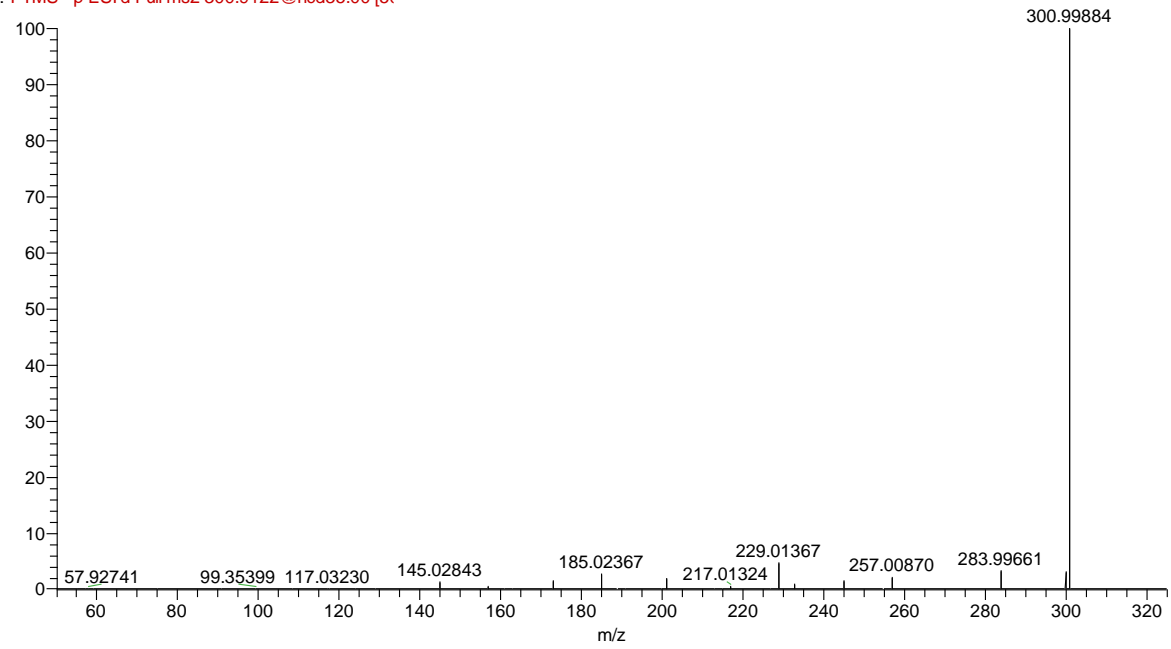

Figure S2. MS2 spectrum of Ellagic acid m/z 300.99845 (ESI-)

Bridelia\_ferruginea\_stembark\_MeOH\_neg #10628 RT: 20.33 AV: 1 NL: 1.36E7  
F: FTMS - p ESI d Full ms2 463.0518@hcd35.00 [5]

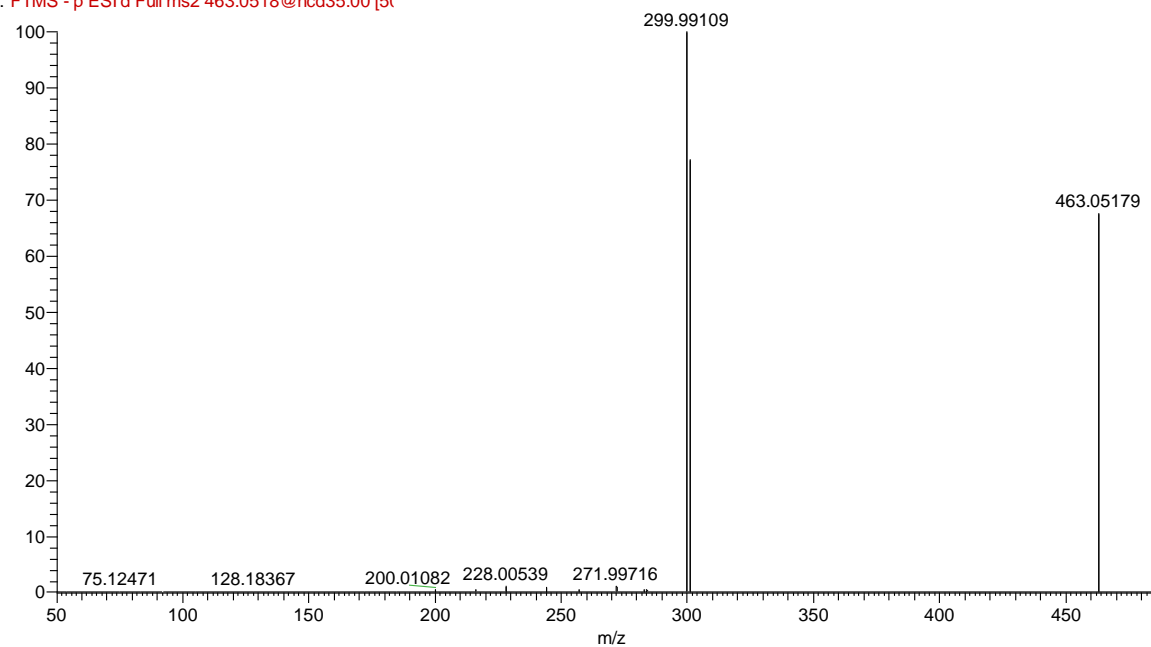

Figure S3. MS2 spectrum of Ellagic acid-O-hexoside m/z 463.05127 (ESI-)

Bridelia\_ferruginea\_stembark\_MeOH\_neg #12230 RT: 23.36 AV: 1 NL: 4.34E7  
F: FTMS - p ESI d Full ms2 433.2355@hcd35.00 [5]

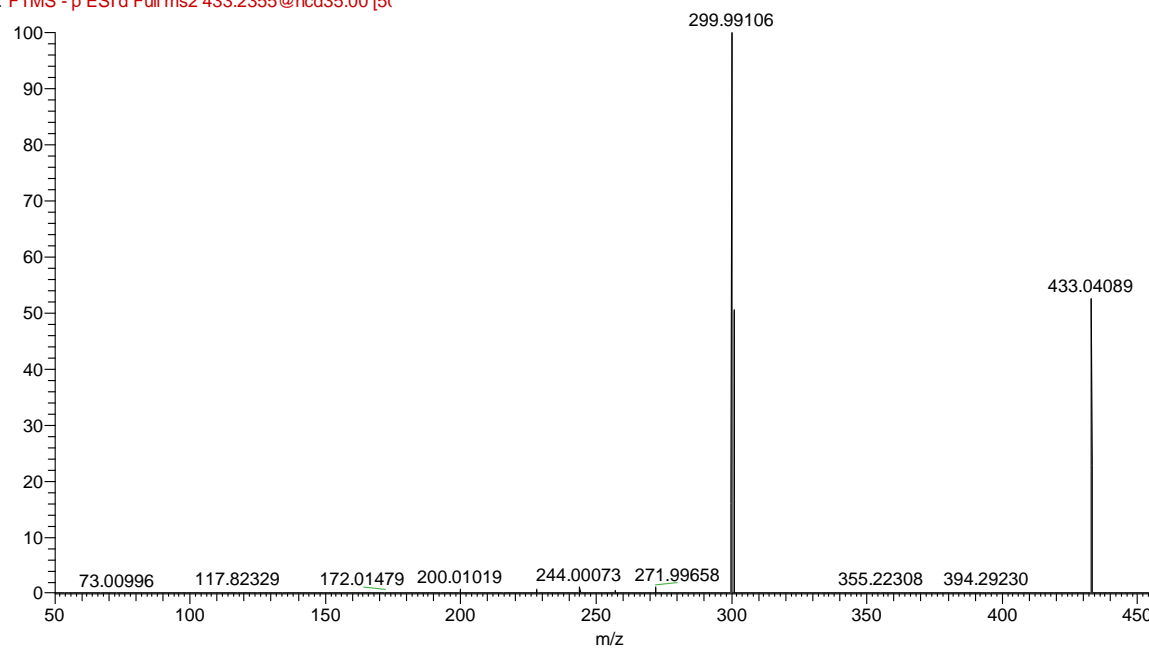

Figure S4. MS2 spectrum of Ellagic acid-O-pentoside m/z 433.04071 (ESI-)

Bridelia\_ferruginea\_stembark\_MeOH\_neg #12356 RT: 23.60 AV: 1 NL: 5.99E6  
F: FTMS - p ESI d Full ms2 447.0567@hcd35.00 [5]

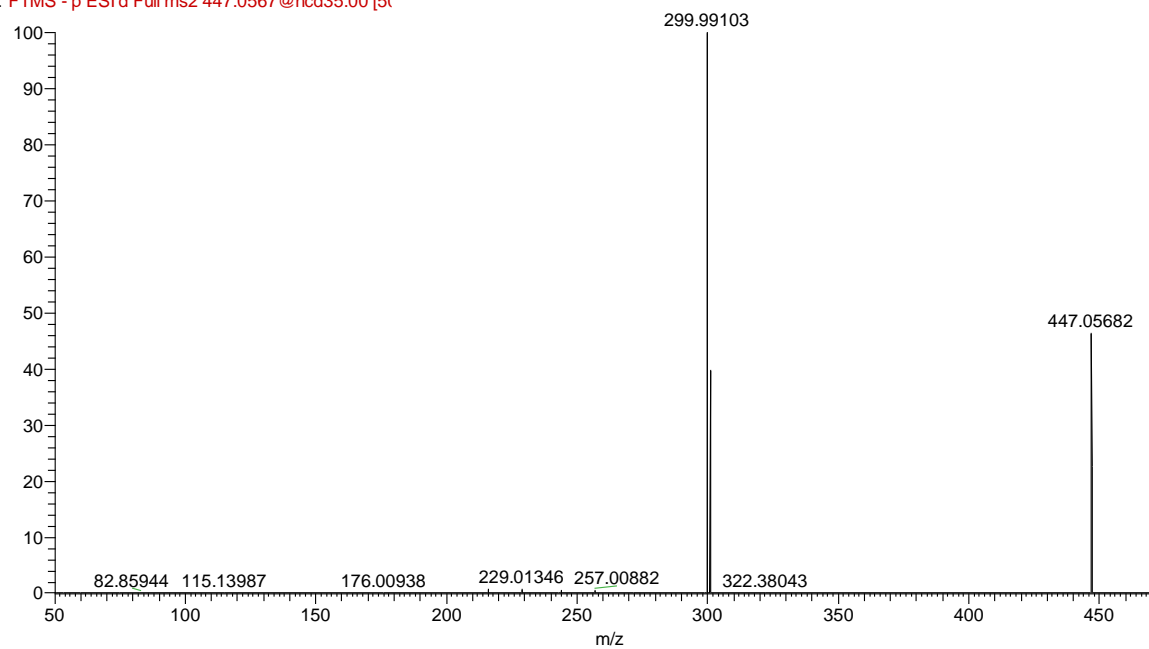

Figure S5. MS2 spectrum of Eschweilenol C (Ellagic acid-4-O-rhamnoside) m/z 447.05636 (ESI-)



Bridelia\_ferruginea\_stembark\_MeOH\_neg #13274 RT: 25.32 AV: 1 NL: 9.64E6  
F: FTMS - p ESI d Full ms2 447.0567@hcd35.00 [5]

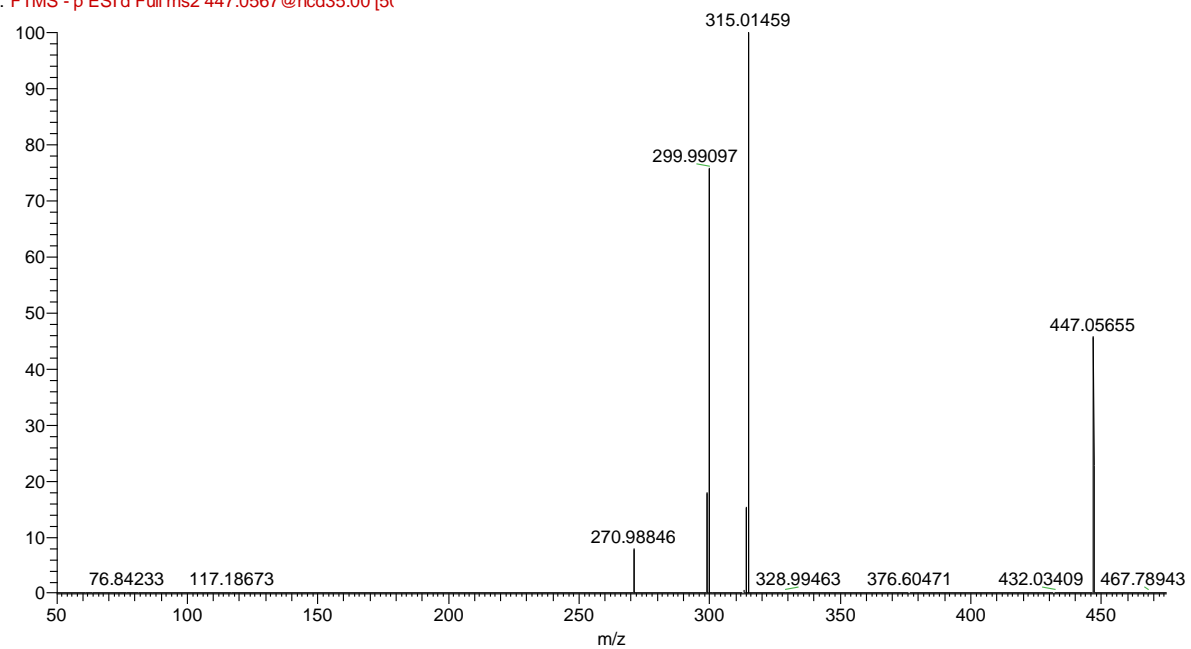

Figure S6. MS2 spectrum of Ducheside A (3-O-Methylelagic acid-4'-O-xyloside) m/z 447.05636 (ESI-)

Bridelia ferruginea\_stembark\_MeOH\_neg #13880 RT: 26.46 AV: 1 NL: 1.11E6  
F: FTMS - p ESI d Full ms2 424.8957@hcd35.00 [5]

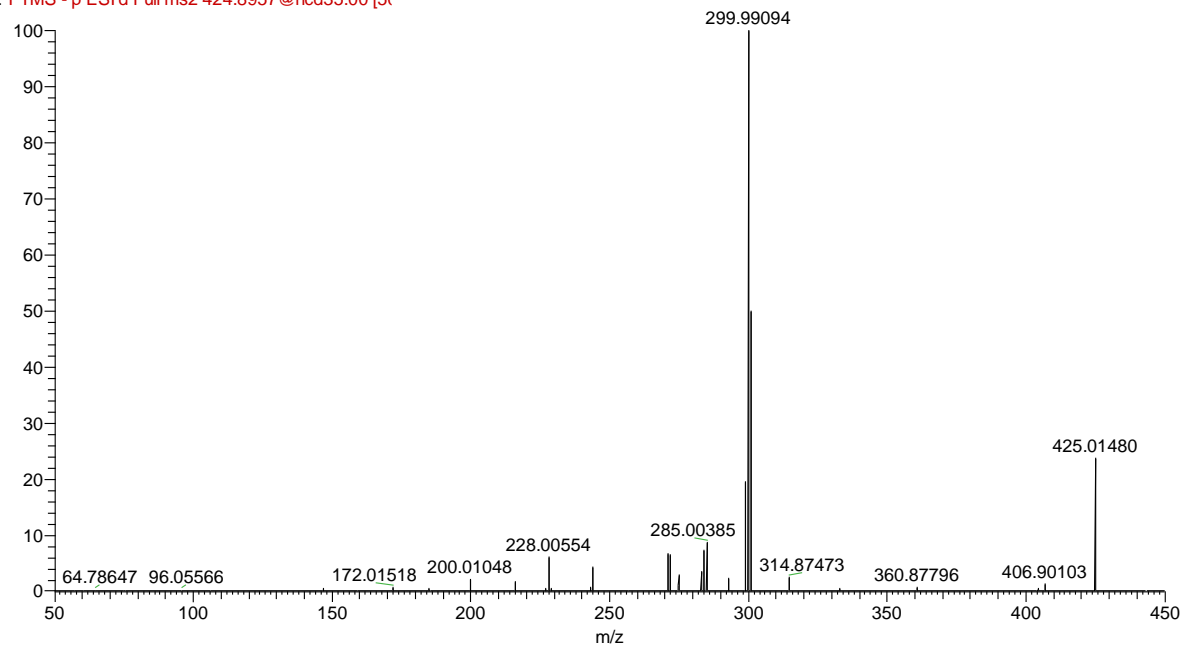

Figure S7. MS2 spectrum of Eschweilenol A or isomer m/z 425.01449 (ESI-)
